# Supplementary material for: Theoretical and experimental studies on the atmospheric degradation of 2-bromo-3,3,3-trifluoropropene
Source: Royal Society of Chemistry journal article supplement (doi:10.1039/c5cp01457c), 2015-01-01
Supplement: c5cp01457c1.pdf [file c5cp01457c1.pdf]

CF<sub>3</sub>CBrCH<sub>2</sub>OH (P<sub>1-3</sub>)

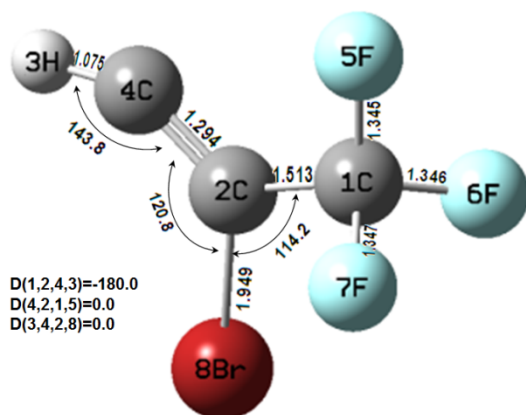

CF<sub>3</sub>C(OH)CH<sub>2</sub> (P<sub>2</sub>)

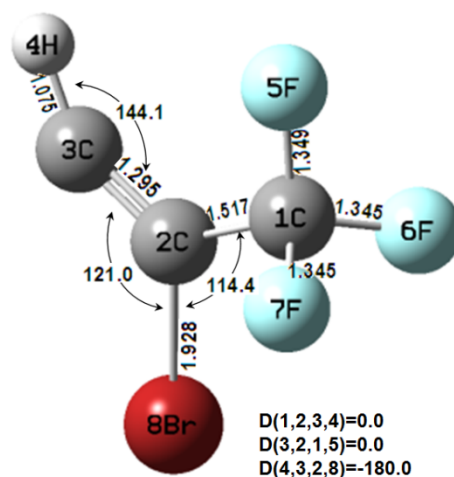

CF<sub>3</sub>CBrCH (P<sub>3-1</sub>)

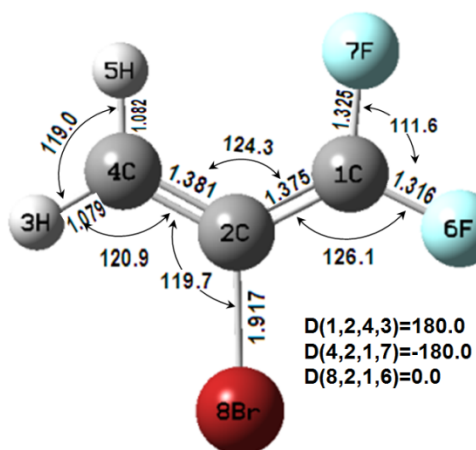

CF<sub>3</sub>CBrCH (P<sub>3-2</sub>)

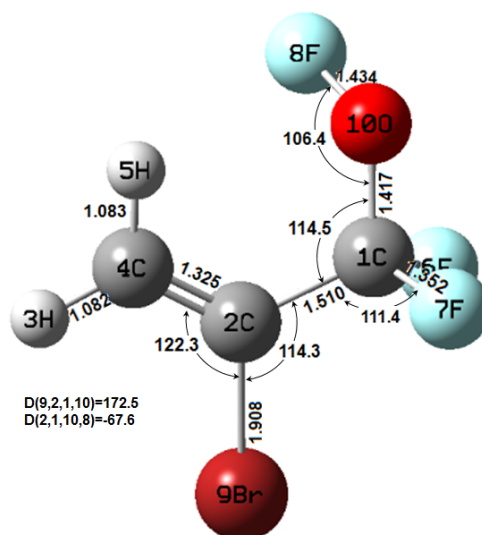

CF<sub>2</sub>CBrCH<sub>2</sub> (P<sub>4</sub>)

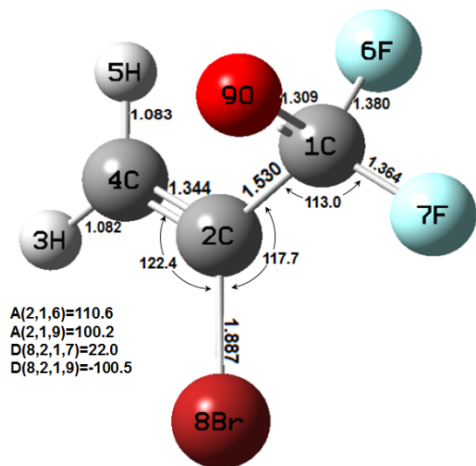

CF<sub>2</sub>(OF)CBrCH<sub>2</sub> (P<sub>5-1</sub>)

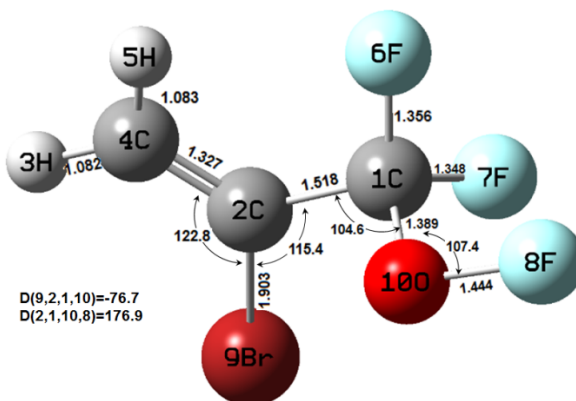

CF<sub>2</sub>(O)CBrCH<sub>2</sub> (P<sub>5-2</sub>)

CF<sub>2</sub>(OF)CBrCH<sub>2</sub> (P<sub>5-3</sub>)

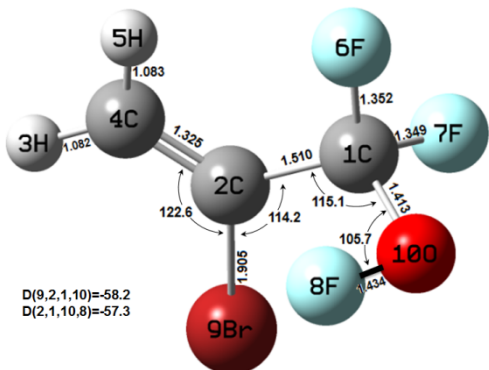

CF<sub>2</sub>(OF)CBrCH<sub>2</sub> (P<sub>5-4</sub>)

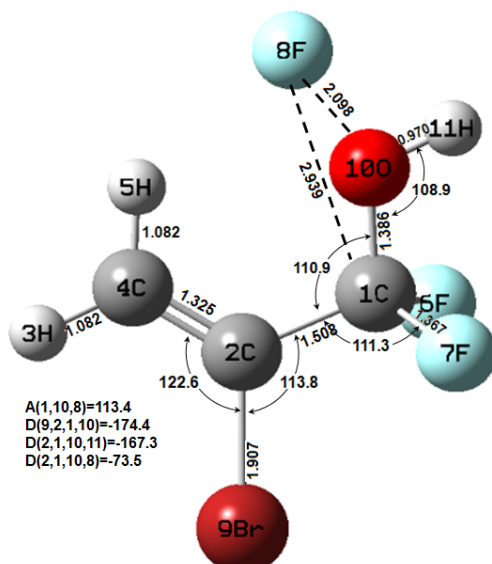

IM<sub>1</sub>

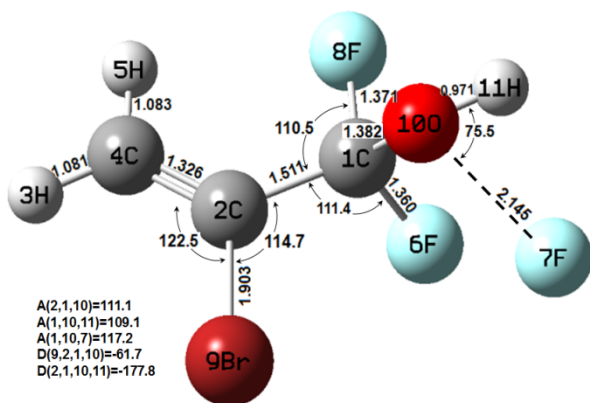

IM<sub>2</sub>

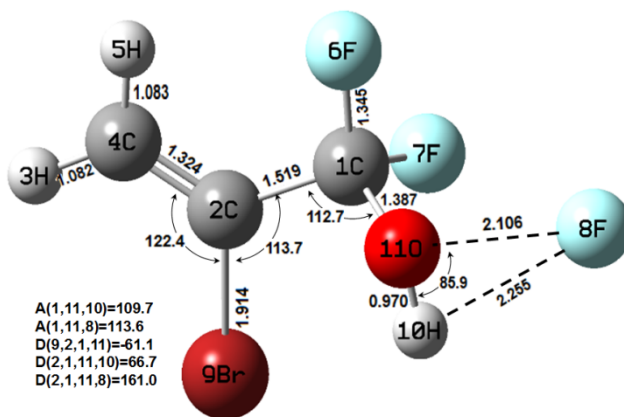

IM<sub>3</sub>

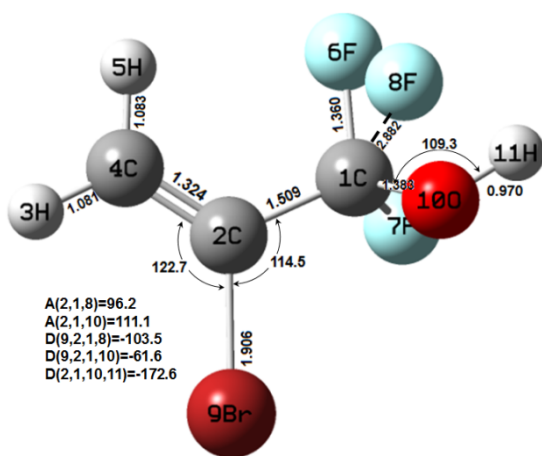

IM<sub>4</sub>

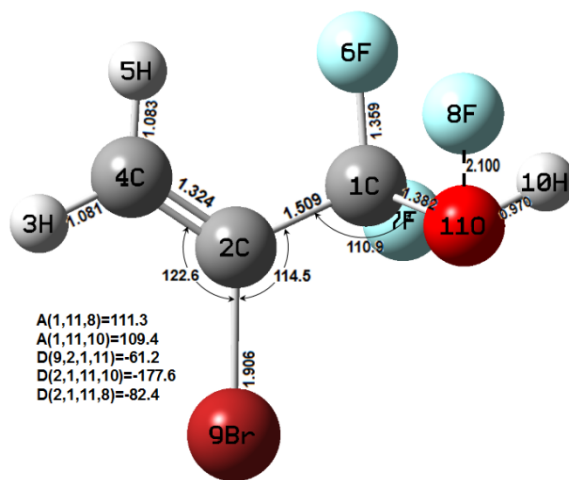

IM<sub>5</sub>

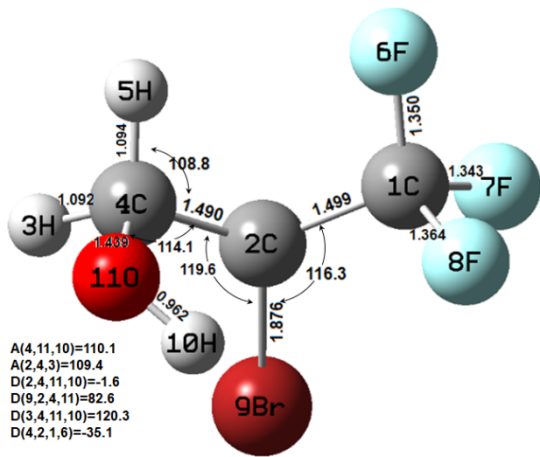

TS<sub>1</sub>

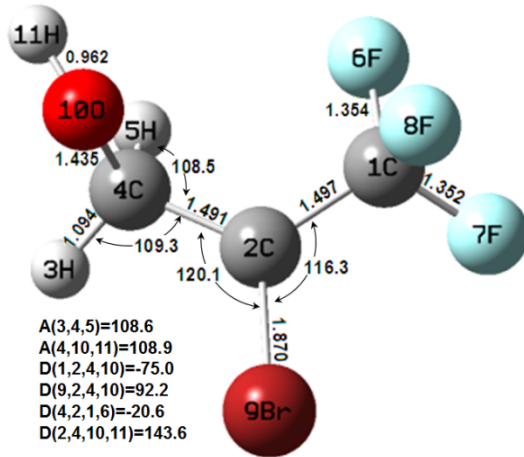

TS<sub>2</sub>

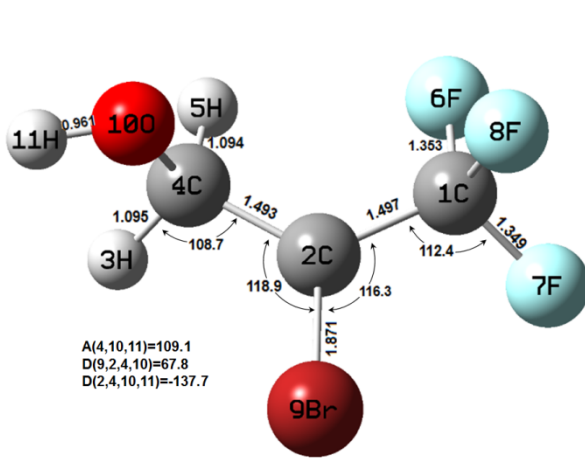

TS<sub>3</sub>

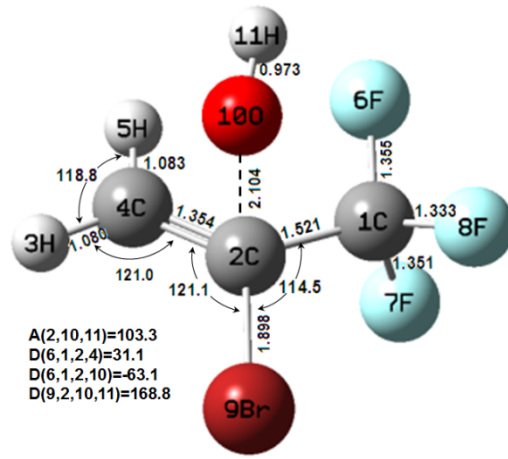

TS<sub>4</sub>

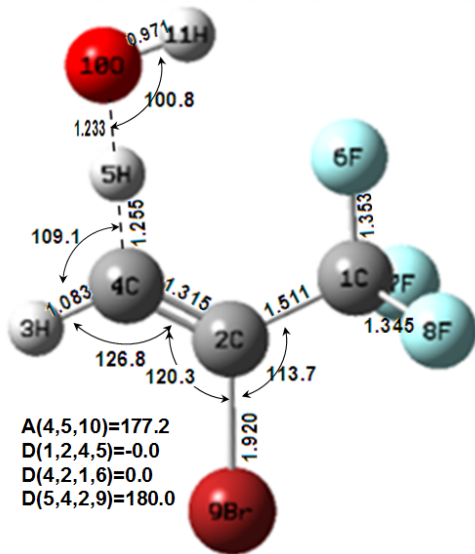

TS<sub>5</sub>

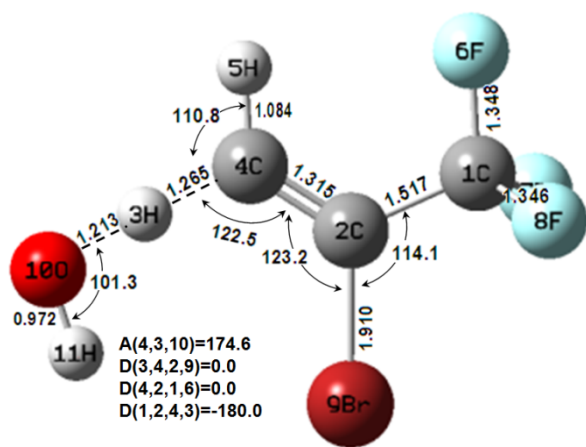

TS<sub>6</sub>



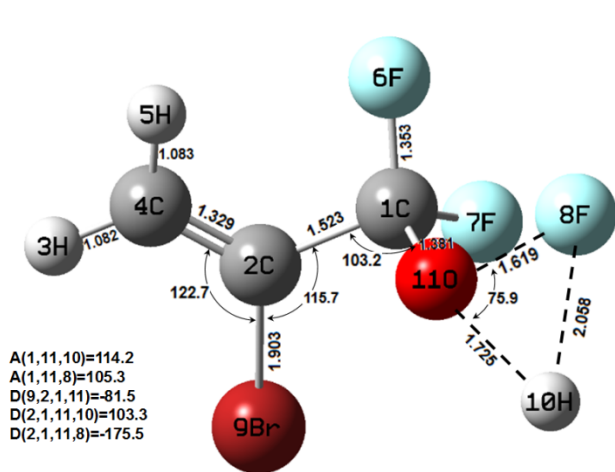

TS<sub>13</sub>

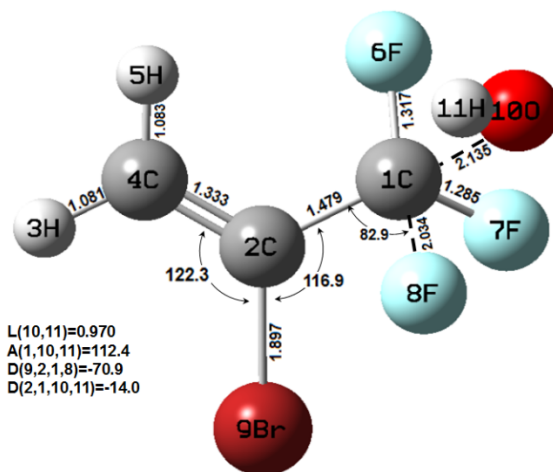

TS<sub>14</sub>

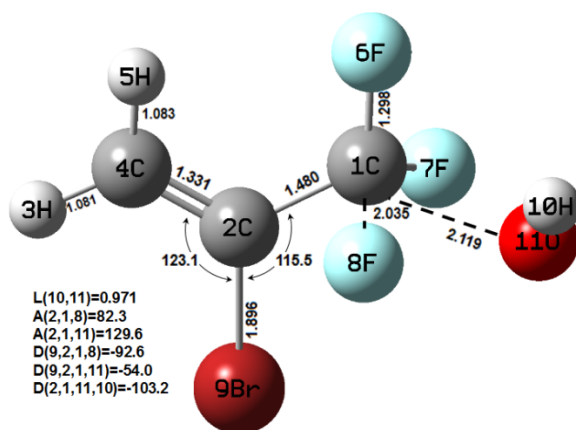

TS<sub>15</sub>

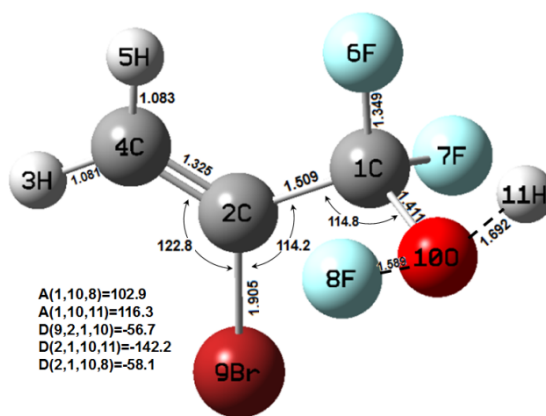

TS<sub>16</sub>

## Appendix B:

Optimized structures and geometrical parameters of various species involved in the subsequent degradation reaction of P<sub>1-1</sub> at the B3LYP/6-311++G (d, p) theory level. Bond distances and angles are in angstroms and degree, respectively.



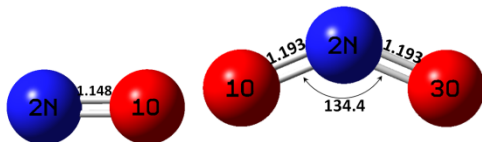

NO

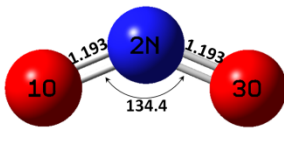

NO<sub>2</sub>

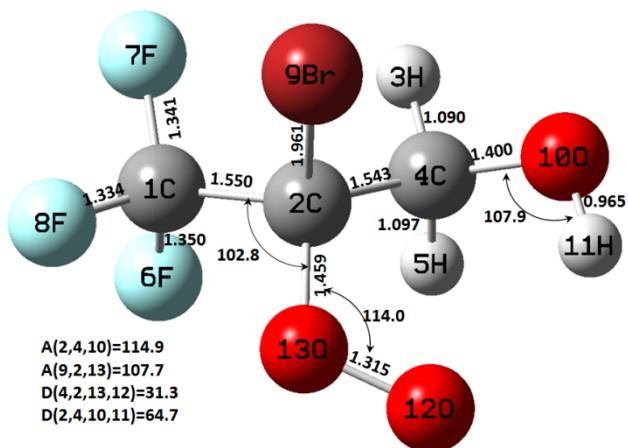

IM<sub>6</sub>

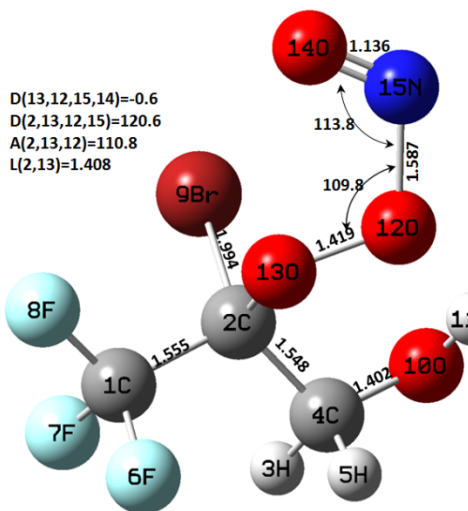

IM<sub>7</sub>

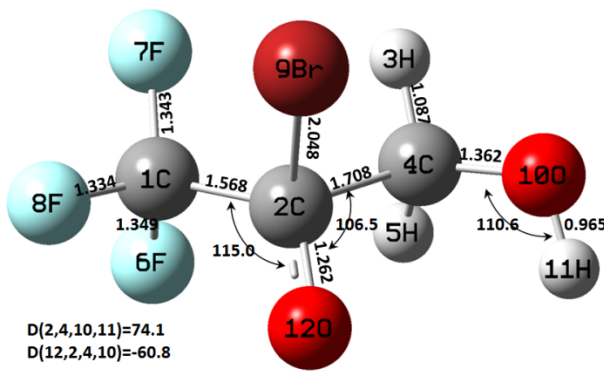

IM<sub>8</sub>

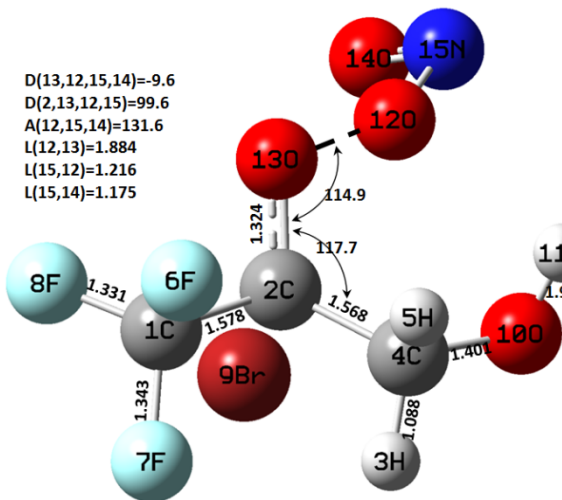

TS<sub>17</sub>

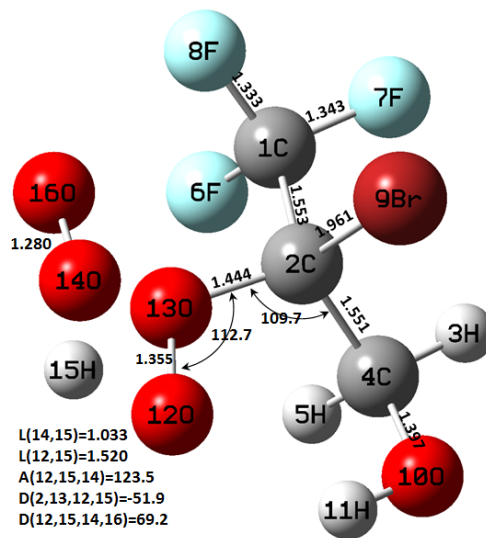

TS<sub>18</sub>

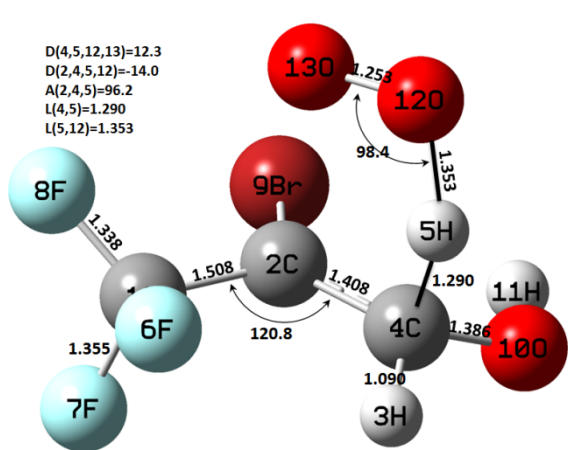

TS<sub>19</sub>

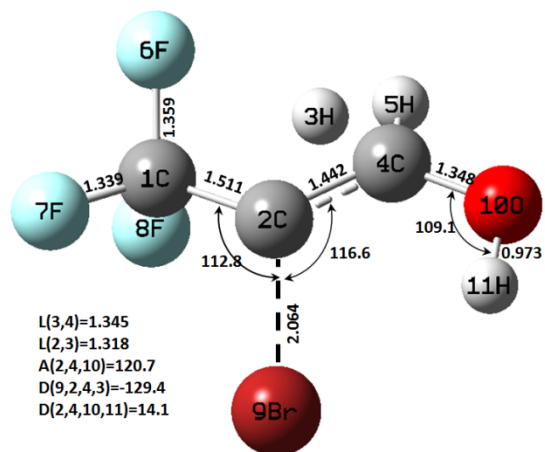

TS<sub>20</sub>

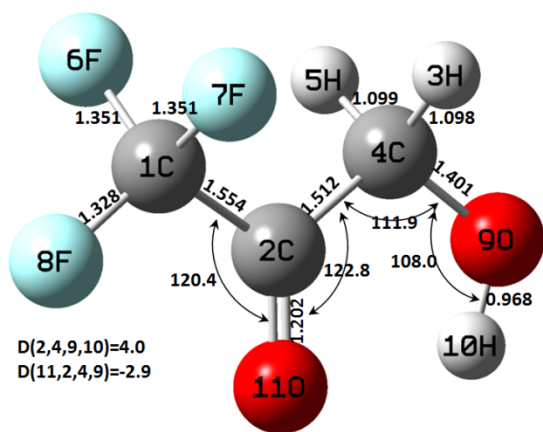

FP<sub>1</sub>

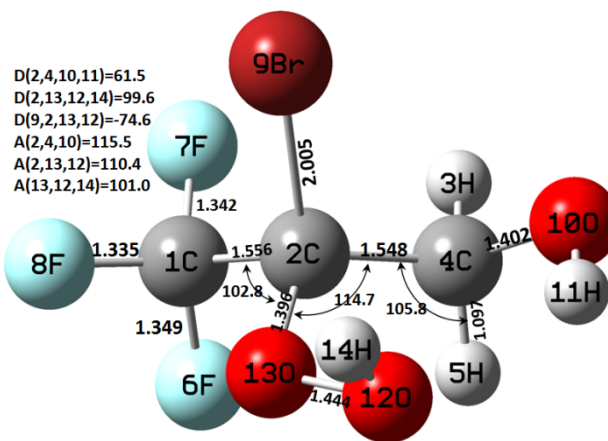

FP<sub>2</sub>

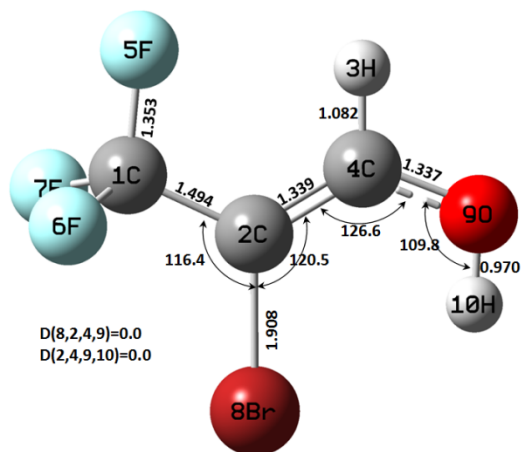

FP<sub>3</sub>

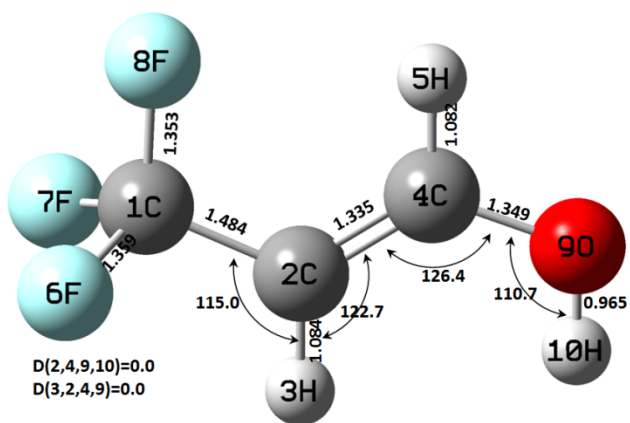

FP<sub>4</sub>
